# Supplementary material
Source: MDPI journal article supplement (https://www.mdpi.com/1424-2818/14/7/569)
Supplement: s1 [file s1]

**Table S2. The 5' fluorescently labeled primer sequences and chromosomal localization of each microsatellite locus used in this study**

| Locus   | Chromosome |         | Primer Sequence (5'-3')           | Fluorescent Dye |
|---------|------------|---------|-----------------------------------|-----------------|
| BM1824  | 1          | Forward | GAG CAA GGT GTT TTT CCA ATC       | NED             |
|         |            | Reverse | CAT TCT CCA ACT GCT TCC TTG       |                 |
| BM2113  | 2          | Forward | GCT GCC TTC TAC CAA ATA CCC       | 6-FAM           |
|         |            | Reverse | CTT CCT GAG AGA AGC AAC ACC       |                 |
| INRA023 | 3          | Forward | GAG TAG AGC TAC AAG ATA AAC TTC   | HEX             |
|         |            | Reverse | TAA CTA CAG GGT GTT AGA TGA ACT C |                 |
| SPS115  | 15         | Forward | AAA GTG ACA CAA CAG CTT CTC CAG   | 6-FAM           |
|         |            | Reverse | AAC GAG TGT CCT AGT TTG GCT GTG   |                 |
| TGLA122 | 21         | Forward | CCC TCC TCC AGG TAA ATC AGC       | HEX             |
|         |            | Reverse | AAT CAC ATG GCA AAT AAG TAC ATA C |                 |
| TGLA126 | 20         | Forward | CTA ATT TAG AAT GAG AGA GGC TTC T | HEX             |
|         |            | Reverse | TTG GTC TCT ATT CTC TGA ATA TTC C |                 |
| TGLA227 | 18         | Forward | CGA ATT CCA AAT CTG TTA ATT TGC T | HEX             |
|         |            | Reverse | ACA GAC AGA AAC TCA ATG AAA GCA   |                 |
| ETH10   | 5          | Forward | GTT CAG GAC TGG CCC TGC TAA CA    | 6-FAM           |
|         |            | Reverse | CCT CCA GCC CAC TTT CTC TTC TC    |                 |
| ETH225  | 9          | Forward | GAT CAC CTT GCC ACT ATT TCC T     | NED             |
|         |            | Reverse | ACA TGA CAG CCA GCT GCT ACT       |                 |
| BM1818  | 23         | Forward | AGCTGGGAATATAACCAAAGG             | HEX             |
|         |            | Reverse | AGTGCTTTCAAGGTCCATGC              |                 |
| TGLA53  | 16         | Forward | GCTTTCAGAAATAGTTTGCAATTCA         | 6-FAM           |
|         |            | Reverse | ATCTTCACATGATATTACAGCAGA          |                 |
