# Supplementary material
Source: MDPI journal article supplement (https://www.mdpi.com/1424-2818/14/7/569)
Supplement: s1 [file s1]

|    | TGLA227 | BM2113  | TGLA53  | ETH10   | SPS115  | TGLA122 | INRA23  | TGLA126 | BM1818  | ETH225  | BM1824  | latitude | longitude | Location    |
|----|---------|---------|---------|---------|---------|---------|---------|---------|---------|---------|---------|----------|-----------|-------------|
| DM | 81 89   | 135 135 | 160 172 | 217 221 | 248 248 | 143 153 | 208 210 | 115 123 | 262 266 | 144 144 | 182 182 | 42.50    | 47.06     | Gergebil    |
| DM | 77 79   | 127 133 | 176 188 | 219 223 | 248 248 | 137 173 | 214 214 | 115 117 | 262 264 | 150 150 | 178 182 | 42.50    | 47.06     | Gergebil    |
| DM | 97 99   | 139 139 | 162 182 | 217 221 | 248 248 | 143 143 | 206 210 | 115 123 | 264 266 | 140 150 | 182 188 | 42.50    | 47.06     | Gergebil    |
| DM | 81 81   | 135 139 | 164 180 | 217 221 | 248 248 | 141 161 | 208 214 | 115 117 | 264 266 | 140 150 | 178 188 | 42.50    | 47.06     | Gergebil    |
| DM | 81 97   | 137 139 | 164 178 | 217 221 | 248 256 | 141 143 | 198 214 | 117 123 | 262 266 | 140 150 | 182 188 | 42.50    | 47.06     | Gergebil    |
| DM | 81 89   | 135 135 | 168 182 | 221 223 | 252 256 | 153 153 | 208 212 | 117 123 | 266 266 | 144 150 | 182 182 | 42.50    | 47.06     | Gergebil    |
| DM | 83 95   | 137 137 | 160 184 | 217 217 | 248 248 | 147 173 | 206 214 | 119 123 | 260 264 | 142 142 | 182 188 | 42.50    | 47.06     | Gergebil    |
| DM | 83 91   | 135 137 | 154 160 | 217 217 | 256 256 | 143 147 | 206 214 | 117 123 | 258 264 | 150 160 | 182 182 | 42.50    | 47.06     | Gergebil    |
| DM | 79 79   | 139 139 | 160 162 | 217 217 | 248 252 | 147 175 | 206 208 | 121 121 | 262 268 | 146 150 | 182 182 | 42.50    | 47.06     | Gergebil    |
| DM | 79 79   | 129 137 | 160 162 | 217 217 | 248 256 | 143 151 | 214 214 | 115 123 | 266 266 | 140 160 | 182 182 | 42.50    | 47.06     | Gergebil    |
| DM | 87 97   | 135 145 | 160 162 | 217 217 | 248 248 | 149 169 | 210 212 | 117 121 | 258 262 | 148 148 | 178 188 | 42.50    | 47.06     | Gergebil    |
| DM | 77 77   | 135 137 | 164 164 | 221 221 | 248 262 | 141 143 | 212 212 | 115 117 | 262 264 | 148 150 | 182 182 | 42.50    | 47.06     | Gergebil    |
| DM | 81 91   | 139 139 | 178 184 | 221 221 | 248 256 | 143 151 | 206 210 | 115 117 | 262 266 | 146 150 | 182 188 | 42.50    | 47.06     | Gergebil    |
| DM | 77 97   | 137 139 | 170 178 | 217 223 | 248 256 | 153 161 | 208 214 | 117 117 | 262 262 | 148 150 | 188 188 | 42.50    | 47.06     | Gergebil    |
| DM | 77 93   | 137 143 | 162 180 | 217 217 | 248 254 | 139 153 | 206 214 | 115 127 | 262 262 | 146 148 | 182 188 | 42.50    | 47.06     | Gergebil    |
| DM | 81 97   | 135 135 | 154 174 | 219 223 | 248 250 | 147 153 | 210 214 | 115 121 | 266 266 | 140 150 | 182 188 | 42.71    | 46.79     | Untsukul    |
| DM | 81 89   | 139 143 | 170 170 | 217 223 | 256 260 | 143 149 | 206 214 | 115 117 | 262 266 | 140 146 | 182 182 | 42.71    | 46.79     | Untsukul    |
| DM | 81 89   | 127 137 | 160 160 | 217 223 | 248 248 | 143 161 | 208 210 | 115 115 | 264 264 | 144 160 | 180 188 | 42.60    | 46.96     | Maidanskoye |
| DM | 89 91   | 135 137 | 170 170 | 219 223 | 248 248 | 141 161 | 208 214 | 115 115 | 262 264 | 148 160 | 178 188 | 42.60    | 46.96     | Maidanskoye |
| DM | 91 97   | 127 139 | 166 166 | 217 217 | 252 254 | 143 173 | 208 214 | 117 123 | 262 266 | 144 160 | 188 188 | 42.60    | 46.96     | Maidanskoye |
| DM | 81 95   | 133 135 | 170 170 | 223 223 | 248 256 | 143 151 | 214 214 | 115 117 | 258 262 | 150 150 | 182 182 | 42.65    | 46.91     | Irganay     |
| DM | 81 87   | 133 135 | 170 170 | 217 223 | 248 256 | 143 151 | 206 214 | 115 117 | 258 262 | 148 150 | 178 182 | 42.65    | 46.91     | Irganay     |
| DM | 95 95   | 139 139 | 170 176 | 221 221 | 248 248 | 143 153 | 198 214 | 115 117 | 262 262 | 140 150 | 180 182 | 42.65    | 46.91     | Irganay     |
| DM | 87 97   | 127 133 | 170 172 | 209 217 | 248 248 | 143 151 | 206 214 | 115 117 | 262 266 | 140 148 | 178 182 | 42.65    | 46.91     | Irganay     |
| DM | 81 81   | 139 141 | 176 176 | 209 223 | 256 260 | 151 153 | 198 212 | 107 123 | 262 264 | 146 150 | 180 188 | 42.65    | 46.91     | Irganay     |
| DM | 81 95   | 135 139 | 170 176 | 221 223 | 248 256 | 151 153 | 198 198 | 107 115 | 258 262 | 140 150 | 180 180 | 42.65    | 46.91     | Irganay     |
| DM | 81 89   | 135 135 | 168 168 | 219 221 | 248 252 | 143 149 | 212 214 | 115 115 | 262 266 | 140 140 | 180 182 | 42.76    | 46.84     | Gimry       |
| DM | 81 99   | 139 141 | 160 174 | 209 217 | 248 252 | 143 153 | 210 216 | 115 117 | 260 266 | 140 148 | 182 182 | 42.76    | 46.84     | Gimry       |
| DM | 81 95   | 127 135 | 160 168 | 209 221 | 252 252 | 143 149 | 212 212 | 115 117 | 260 262 | 140 150 | 182 188 | 42.76    | 46.84     | Gimry       |
| DM | 81 99   | 129 135 | 160 160 | 217 217 | 248 260 | 143 143 | 212 212 | 117 117 | 266 266 | 140 150 | 182 188 | 42.76    | 46.84     | Gimry       |
| DM | 81 81   | 135 141 | 160 170 | 209 217 | 252 260 | 143 143 | 212 216 | 115 117 | 260 266 | 140 150 | 182 188 | 42.76    | 46.84     | Gimry       |
| DM | 81 99   | 139 141 | 160 160 | 209 217 | 248 252 | 143 153 | 210 216 | 115 117 | 260 266 | 140 148 | 182 182 | 42.76    | 46.84     | Gimry       |

|    |    |    |     |     |     |     |     |     |     |     |     |     |     |     |     |     |     |     |     |     |     |     |       |       |                         |
|----|----|----|-----|-----|-----|-----|-----|-----|-----|-----|-----|-----|-----|-----|-----|-----|-----|-----|-----|-----|-----|-----|-------|-------|-------------------------|
| DM | 81 | 81 | 125 | 135 | 162 | 172 | 217 | 221 | 248 | 254 | 143 | 181 | 212 | 214 | 115 | 123 | 266 | 266 | 140 | 146 | 182 | 188 | 43.12 | 46.52 | Kizilyurtovsky District |
| DM | 83 | 95 | 125 | 139 | 168 | 172 | 217 | 217 | 248 | 254 | 143 | 153 | 204 | 216 | 115 | 115 | 262 | 266 | 150 | 156 | 182 | 182 | 43.12 | 46.52 | Kizilyurtovsky District |
| DM | 87 | 95 | 127 | 139 | 168 | 172 | 217 | 221 | 248 | 248 | 143 | 161 | 206 | 208 | 113 | 115 | 262 | 266 | 140 | 148 | 178 | 182 | 43.12 | 46.52 | Kizilyurtovsky District |
| DM | 81 | 81 | 127 | 135 | 160 | 172 | 217 | 217 | 248 | 248 | 143 | 153 | 212 | 214 | 117 | 123 | 266 | 266 | 146 | 150 | 180 | 182 | 43.12 | 46.52 | Kizilyurtovsky District |
| DM | 79 | 79 | 125 | 125 | 158 | 168 | 217 | 223 | 248 | 248 | 153 | 153 | 206 | 216 | 115 | 121 | 262 | 266 | 150 | 156 | 178 | 182 | 43.12 | 46.52 | Kizilyurtovsky District |
| DM | 79 | 83 | 127 | 135 | 160 | 170 | 219 | 221 | 248 | 252 | 143 | 181 | 200 | 206 | 115 | 117 | 266 | 266 | 150 | 150 | 180 | 182 | 43.12 | 46.52 | Kizilyurtovsky District |
| DM | 81 | 81 | 131 | 133 | 160 | 170 | 221 | 223 | 252 | 256 | 155 | 181 | 206 | 208 | 117 | 117 | 266 | 266 | 150 | 150 | 182 | 182 | 43.12 | 46.52 | Kizilyurtovsky District |
| DM | 81 | 81 | 133 | 137 | 164 | 172 | 217 | 221 | 248 | 248 | 149 | 175 | 208 | 212 | 115 | 117 | 258 | 260 | 148 | 152 | 182 | 182 | 43.12 | 46.52 | Kizilyurtovsky District |
| DM | 91 | 99 | 133 | 135 | 180 | 182 | 219 | 221 | 248 | 248 | 151 | 181 | 206 | 214 | 115 | 115 | 258 | 258 | 148 | 150 | 178 | 182 | 43.12 | 46.52 | Kizilyurtovsky District |
| DM | 0  | 0  | 127 | 135 | 160 | 172 | 217 | 221 | 248 | 250 | 151 | 151 | 208 | 210 | 115 | 117 | 266 | 266 | 148 | 150 | 182 | 182 | 43.12 | 46.52 | Kizilyurtovsky District |
| DM | 81 | 91 | 133 | 137 | 162 | 184 | 217 | 217 | 246 | 248 | 143 | 175 | 212 | 212 | 115 | 115 | 260 | 266 | 148 | 158 | 178 | 182 | 43.12 | 46.52 | Kizilyurtovsky District |
| DM | 81 | 91 | 137 | 139 | 182 | 184 | 217 | 217 | 248 | 248 | 161 | 183 | 200 | 214 | 117 | 117 | 260 | 266 | 146 | 146 | 180 | 182 | 43.12 | 46.52 | Kizilyurtovsky District |
| DM | 97 | 97 | 127 | 135 | 160 | 170 | 219 | 219 | 248 | 248 | 143 | 147 | 206 | 212 | 115 | 115 | 260 | 262 | 144 | 148 | 182 | 182 | 43.12 | 46.52 | Kizilyurtovsky District |
| DM | 81 | 83 | 127 | 137 | 168 | 170 | 217 | 217 | 248 | 260 | 143 | 143 | 206 | 206 | 123 | 123 | 262 | 266 | 140 | 150 | 188 | 188 | 43.12 | 46.52 | Kizilyurtovsky District |
| DM | 77 | 77 | 127 | 137 | 0   | 0   | 217 | 217 | 248 | 252 | 143 | 153 | 206 | 214 | 115 | 123 | 262 | 264 | 148 | 150 | 178 | 182 | 43.12 | 46.52 | Kizilyurtovsky District |
| DM | 79 | 79 | 127 | 127 | 160 | 162 | 219 | 221 | 248 | 254 | 143 | 161 | 206 | 210 | 115 | 123 | 258 | 260 | 144 | 144 | 182 | 182 | 43.12 | 46.52 | Kizilyurtovsky District |
| DM | 81 | 81 | 135 | 137 | 162 | 164 | 217 | 221 | 248 | 248 | 149 | 153 | 210 | 212 | 117 | 123 | 266 | 266 | 144 | 150 | 178 | 180 | 43.12 | 46.52 | Kizilyurtovsky District |
| DM | 79 | 79 | 125 | 135 | 154 | 160 | 217 | 219 | 256 | 258 | 143 | 149 | 210 | 214 | 121 | 123 | 262 | 266 | 144 | 144 | 180 | 188 | 43.12 | 46.52 | Kizilyurtovsky District |
| DM | 91 | 93 | 127 | 139 | 164 | 164 | 217 | 217 | 248 | 258 | 143 | 151 | 206 | 214 | 117 | 117 | 266 | 266 | 140 | 148 | 182 | 188 | 43.12 | 46.52 | Kizilyurtovsky District |
| DM | 83 | 95 | 131 | 137 | 162 | 188 | 219 | 221 | 248 | 260 | 147 | 161 | 206 | 208 | 117 | 123 | 260 | 266 | 144 | 154 | 182 | 188 | 43.12 | 46.52 | Kizilyurtovsky District |
| DM | 79 | 79 | 131 | 135 | 160 | 166 | 221 | 221 | 248 | 256 | 151 | 181 | 206 | 208 | 117 | 117 | 260 | 266 | 144 | 150 | 188 | 188 | 43.12 | 46.52 | Kizilyurtovsky District |
| DM | 81 | 81 | 129 | 139 | 162 | 164 | 219 | 221 | 248 | 248 | 143 | 175 | 206 | 214 | 115 | 115 | 262 | 262 | 140 | 144 | 180 | 188 | 43.12 | 46.52 | Kizilyurtovsky District |
| DM | 81 | 81 | 127 | 135 | 160 | 184 | 219 | 221 | 248 | 256 | 143 | 149 | 200 | 206 | 117 | 117 | 262 | 266 | 140 | 146 | 182 | 188 | 43.12 | 46.52 | Kizilyurtovsky District |
| DM | 83 | 87 | 131 | 139 | 176 | 188 | 217 | 221 | 254 | 260 | 143 | 151 | 206 | 208 | 115 | 115 | 260 | 260 | 150 | 150 | 182 | 182 | 43.12 | 46.52 | Kizilyurtovsky District |
| DM | 81 | 81 | 127 | 135 | 160 | 170 | 217 | 221 | 248 | 260 | 153 | 173 | 214 | 214 | 115 | 123 | 262 | 266 | 144 | 154 | 178 | 188 | 43.12 | 46.52 | Kizilyurtovsky District |
| DM | 77 | 97 | 135 | 139 | 170 | 184 | 217 | 219 | 248 | 248 | 143 | 143 | 212 | 214 | 117 | 123 | 260 | 260 | 140 | 144 | 182 | 188 | 43.12 | 46.52 | Kizilyurtovsky District |
| DM | 77 | 87 | 127 | 127 | 168 | 184 | 217 | 219 | 252 | 258 | 151 | 169 | 206 | 216 | 123 | 123 | 262 | 266 | 144 | 144 | 180 | 188 | 43.12 | 46.52 | Kizilyurtovsky District |
| DM | 81 | 83 | 131 | 133 | 160 | 164 | 221 | 221 | 248 | 256 | 143 | 161 | 210 | 210 | 115 | 123 | 260 | 266 | 140 | 144 | 180 | 182 | 43.12 | 46.52 | Kizilyurtovsky District |
| DM | 91 | 97 | 127 | 135 | 168 | 170 | 219 | 221 | 248 | 254 | 153 | 161 | 208 | 214 | 117 | 117 | 258 | 262 | 144 | 150 | 188 | 188 | 43.12 | 46.52 | Kizilyurtovsky District |
| DM | 91 | 93 | 133 | 135 | 170 | 180 | 221 | 225 | 248 | 260 | 153 | 161 | 204 | 214 | 115 | 115 | 266 | 266 | 140 | 148 | 178 | 182 | 43.12 | 46.52 | Kizilyurtovsky District |
| DM | 81 | 91 | 135 | 143 | 160 | 168 | 217 | 217 | 248 | 248 | 143 | 151 | 206 | 208 | 117 | 117 | 262 | 262 | 140 | 150 | 180 | 182 | 43.12 | 46.52 | Kizilyurtovsky District |
| DM | 97 | 97 | 127 | 133 | 166 | 170 | 217 | 221 | 248 | 254 | 147 | 153 | 212 | 214 | 0   | 0   | 262 | 266 | 150 | 156 | 182 | 188 | 43.12 | 46.52 | Kizilyurtovsky District |
| DM | 81 | 81 | 133 | 139 | 160 | 176 | 217 | 221 | 254 | 258 | 141 | 161 | 202 | 214 | 119 | 123 | 258 | 262 | 140 | 158 | 188 | 188 | 43.12 | 46.52 | Kizilyurtovsky District |

|    |    |    |     |     |     |     |     |     |     |     |     |     |     |     |     |     |     |     |     |     |     |     |       |       |                         |
|----|----|----|-----|-----|-----|-----|-----|-----|-----|-----|-----|-----|-----|-----|-----|-----|-----|-----|-----|-----|-----|-----|-------|-------|-------------------------|
| DM | 91 | 97 | 127 | 137 | 160 | 170 | 221 | 221 | 248 | 248 | 143 | 161 | 212 | 216 | 115 | 117 | 260 | 266 | 144 | 150 | 182 | 188 | 43.12 | 46.52 | Kizilyurtovsky District |
| DM | 89 | 97 | 131 | 139 | 160 | 188 | 217 | 219 | 248 | 248 | 143 | 147 | 206 | 206 | 115 | 115 | 266 | 266 | 148 | 154 | 182 | 182 | 43.12 | 46.52 | Kizilyurtovsky District |
| DM | 87 | 97 | 127 | 135 | 168 | 168 | 217 | 221 | 248 | 256 | 143 | 161 | 212 | 212 | 115 | 117 | 258 | 262 | 144 | 148 | 188 | 188 | 43.12 | 46.52 | Kizilyurtovsky District |
| DM | 97 | 97 | 133 | 139 | 162 | 172 | 213 | 217 | 248 | 248 | 151 | 173 | 202 | 208 | 117 | 117 | 262 | 262 | 140 | 140 | 178 | 188 | 43.12 | 46.52 | Kizilyurtovsky District |
| DM | 91 | 91 | 137 | 137 | 154 | 164 | 219 | 221 | 248 | 248 | 149 | 151 | 206 | 206 | 117 | 117 | 264 | 266 | 148 | 150 | 180 | 188 | 43.12 | 46.52 | Kizilyurtovsky District |
| DM | 93 | 95 | 139 | 143 | 170 | 180 | 219 | 221 | 248 | 248 | 161 | 179 | 208 | 214 | 117 | 117 | 258 | 260 | 150 | 150 | 180 | 182 | 43.12 | 46.52 | Kizilyurtovsky District |
| DM | 91 | 93 | 129 | 139 | 160 | 162 | 217 | 221 | 248 | 260 | 143 | 161 | 206 | 214 | 115 | 117 | 262 | 262 | 140 | 140 | 182 | 182 | 43.12 | 46.52 | Kizilyurtovsky District |
| DM | 97 | 99 | 137 | 139 | 160 | 162 | 217 | 219 | 248 | 248 | 143 | 179 | 204 | 206 | 117 | 117 | 258 | 262 | 140 | 150 | 182 | 188 | 43.12 | 46.52 | Kizilyurtovsky District |
| DM | 79 | 79 | 125 | 141 | 158 | 158 | 217 | 223 | 248 | 248 | 151 | 153 | 216 | 216 | 115 | 115 | 264 | 266 | 150 | 156 | 182 | 182 | 43.12 | 46.52 | Kizilyurtovsky District |
| DM | 77 | 81 | 133 | 135 | 162 | 176 | 217 | 219 | 248 | 258 | 141 | 143 | 202 | 206 | 117 | 119 | 262 | 266 | 140 | 158 | 180 | 188 | 43.12 | 46.52 | Kizilyurtovsky District |
| DM | 81 | 91 | 135 | 139 | 162 | 184 | 217 | 217 | 248 | 260 | 139 | 153 | 206 | 208 | 115 | 117 | 262 | 266 | 150 | 150 | 188 | 188 | 43.12 | 46.52 | Kizilyurtovsky District |
| DM | 79 | 81 | 133 | 137 | 170 | 172 | 217 | 223 | 248 | 248 | 143 | 153 | 206 | 212 | 117 | 117 | 262 | 262 | 150 | 152 | 178 | 182 | 43.12 | 46.52 | Kizilyurtovsky District |
| DM | 91 | 93 | 133 | 137 | 154 | 154 | 221 | 223 | 248 | 248 | 149 | 175 | 206 | 206 | 115 | 117 | 264 | 266 | 144 | 150 | 180 | 182 | 43.12 | 46.52 | Kizilyurtovsky District |
| DM | 91 | 97 | 129 | 135 | 170 | 182 | 217 | 223 | 248 | 248 | 143 | 151 | 206 | 214 | 115 | 117 | 266 | 266 | 140 | 148 | 180 | 188 | 43.12 | 46.52 | Kizilyurtovsky District |
| DM | 83 | 91 | 127 | 137 | 160 | 168 | 217 | 221 | 258 | 258 | 143 | 151 | 206 | 208 | 115 | 123 | 262 | 266 | 140 | 144 | 182 | 188 | 43.12 | 46.52 | Kizilyurtovsky District |
| DM | 79 | 91 | 137 | 137 | 162 | 172 | 219 | 223 | 248 | 248 | 143 | 151 | 212 | 214 | 117 | 123 | 262 | 266 | 148 | 152 | 182 | 188 | 43.12 | 46.52 | Kizilyurtovsky District |
| DM | 81 | 81 | 127 | 129 | 160 | 162 | 219 | 221 | 248 | 248 | 143 | 143 | 206 | 206 | 117 | 117 | 262 | 262 | 140 | 150 | 182 | 188 | 43.12 | 46.52 | Kizilyurtovsky District |
| DM | 85 | 89 | 131 | 133 | 168 | 176 | 217 | 219 | 248 | 248 | 143 | 151 | 206 | 212 | 115 | 117 | 266 | 280 | 148 | 156 | 178 | 186 | 43.12 | 46.52 | Kizilyurtovsky District |
| DM | 95 | 97 | 135 | 135 | 162 | 170 | 217 | 221 | 258 | 260 | 143 | 153 | 214 | 214 | 115 | 117 | 260 | 260 | 140 | 156 | 182 | 182 | 43.12 | 46.52 | Kizilyurtovsky District |
| DM | 87 | 97 | 133 | 135 | 168 | 188 | 217 | 221 | 248 | 260 | 143 | 151 | 208 | 212 | 115 | 117 | 258 | 266 | 144 | 144 | 182 | 182 | 43.12 | 46.52 | Kizilyurtovsky District |
| DM | 93 | 97 | 135 | 135 | 172 | 188 | 221 | 221 | 248 | 254 | 151 | 173 | 208 | 214 | 115 | 117 | 258 | 266 | 144 | 144 | 178 | 182 | 43.12 | 46.52 | Kizilyurtovsky District |
| DM | 93 | 97 | 135 | 139 | 168 | 170 | 217 | 221 | 248 | 260 | 143 | 153 | 208 | 214 | 115 | 117 | 260 | 266 | 140 | 144 | 182 | 182 | 43.12 | 46.52 | Kizilyurtovsky District |
| DM | 81 | 81 | 133 | 139 | 176 | 182 | 217 | 217 | 248 | 248 | 169 | 173 | 206 | 214 | 115 | 123 | 262 | 266 | 140 | 144 | 186 | 188 | 43.12 | 46.52 | Kizilyurtovsky District |
| DM | 97 | 99 | 131 | 137 | 160 | 176 | 217 | 221 | 248 | 254 | 143 | 151 | 206 | 206 | 117 | 117 | 260 | 264 | 144 | 148 | 182 | 188 | 43.12 | 46.52 | Kizilyurtovsky District |
| DM | 95 | 99 | 127 | 135 | 162 | 168 | 221 | 221 | 248 | 248 | 151 | 161 | 206 | 212 | 113 | 115 | 262 | 262 | 148 | 150 | 178 | 182 | 43.12 | 46.52 | Kizilyurtovsky District |
| DM | 91 | 93 | 133 | 135 | 160 | 176 | 215 | 217 | 256 | 260 | 147 | 151 | 206 | 214 | 117 | 117 | 266 | 268 | 144 | 156 | 182 | 188 | 43.12 | 46.52 | Kizilyurtovsky District |
| DM | 0  | 0  | 133 | 139 | 170 | 170 | 221 | 223 | 248 | 260 | 143 | 151 | 210 | 212 | 117 | 117 | 258 | 262 | 144 | 150 | 182 | 188 | 43.12 | 46.52 | Kizilyurtovsky District |
| DM | 81 | 81 | 135 | 137 | 170 | 170 | 217 | 223 | 248 | 248 | 151 | 151 | 206 | 206 | 115 | 117 | 262 | 266 | 140 | 148 | 180 | 188 | 43.12 | 46.52 | Kizilyurtovsky District |
| DM | 81 | 91 | 131 | 139 | 164 | 182 | 219 | 221 | 248 | 248 | 151 | 175 | 214 | 214 | 115 | 117 | 258 | 266 | 140 | 148 | 180 | 188 | 43.12 | 46.52 | Kizilyurtovsky District |
| DM | 83 | 91 | 127 | 131 | 168 | 186 | 217 | 221 | 260 | 260 | 143 | 151 | 206 | 216 | 123 | 123 | 260 | 262 | 140 | 144 | 188 | 188 | 43.12 | 46.52 | Kizilyurtovsky District |
| DM | 81 | 81 | 127 | 133 | 160 | 160 | 221 | 221 | 248 | 252 | 143 | 145 | 206 | 216 | 115 | 117 | 266 | 266 | 150 | 150 | 182 | 188 | 43.12 | 46.52 | Kizilyurtovsky District |
| DM | 91 | 91 | 131 | 135 | 160 | 166 | 219 | 221 | 256 | 260 | 151 | 151 | 208 | 212 | 115 | 117 | 266 | 266 | 144 | 150 | 182 | 188 | 43.12 | 46.52 | Kizilyurtovsky District |
| DM | 83 | 83 | 129 | 131 | 160 | 176 | 217 | 221 | 248 | 248 | 161 | 161 | 208 | 216 | 115 | 115 | 260 | 266 | 148 | 150 | 182 | 182 | 43.12 | 46.52 | Kizilyurtovsky District |

|    |    |    |     |     |     |     |     |     |     |     |     |     |     |     |     |     |     |     |     |     |     |     |       |       |                         |
|----|----|----|-----|-----|-----|-----|-----|-----|-----|-----|-----|-----|-----|-----|-----|-----|-----|-----|-----|-----|-----|-----|-------|-------|-------------------------|
| DM | 81 | 81 | 127 | 133 | 160 | 160 | 219 | 221 | 248 | 252 | 151 | 153 | 206 | 210 | 123 | 123 | 264 | 266 | 140 | 156 | 182 | 188 | 43.12 | 46.52 | Kizilyurtovsky District |
| DM | 91 | 93 | 137 | 139 | 162 | 162 | 217 | 219 | 248 | 248 | 143 | 153 | 200 | 206 | 117 | 117 | 262 | 266 | 140 | 158 | 188 | 188 | 43.12 | 46.52 | Kizilyurtovsky District |
| DM | 95 | 97 | 127 | 135 | 172 | 176 | 219 | 221 | 248 | 254 | 143 | 151 | 206 | 214 | 115 | 117 | 266 | 266 | 144 | 148 | 182 | 182 | 43.12 | 46.52 | Kizilyurtovsky District |
| DM | 91 | 97 | 131 | 135 | 160 | 162 | 221 | 221 | 260 | 260 | 151 | 153 | 214 | 216 | 115 | 117 | 260 | 266 | 150 | 156 | 182 | 188 | 43.12 | 46.52 | Kizilyurtovsky District |
| DM | 83 | 93 | 139 | 139 | 160 | 186 | 217 | 219 | 248 | 248 | 147 | 147 | 206 | 212 | 115 | 123 | 262 | 266 | 148 | 154 | 182 | 188 | 43.12 | 46.52 | Kizilyurtovsky District |
| DM | 79 | 81 | 131 | 135 | 160 | 176 | 217 | 219 | 250 | 256 | 141 | 149 | 214 | 214 | 117 | 117 | 262 | 262 | 150 | 150 | 178 | 180 | 43.12 | 46.52 | Kizilyurtovsky District |
| DM | 79 | 79 | 137 | 139 | 160 | 162 | 217 | 221 | 248 | 256 | 141 | 151 | 204 | 206 | 117 | 117 | 262 | 264 | 140 | 152 | 182 | 188 | 43.12 | 46.52 | Kizilyurtovsky District |
| DM | 93 | 97 | 139 | 139 | 162 | 176 | 217 | 217 | 248 | 248 | 151 | 153 | 200 | 206 | 117 | 117 | 262 | 268 | 140 | 150 | 182 | 188 | 43.12 | 46.52 | Kizilyurtovsky District |
| DM | 91 | 97 | 127 | 133 | 160 | 172 | 217 | 223 | 248 | 256 | 143 | 155 | 206 | 208 | 115 | 115 | 266 | 266 | 150 | 156 | 182 | 182 | 43.12 | 46.52 | Kizilyurtovsky District |
| DM | 85 | 87 | 133 | 137 | 162 | 180 | 219 | 221 | 248 | 260 | 147 | 147 | 206 | 210 | 115 | 115 | 258 | 266 | 144 | 150 | 180 | 182 | 43.12 | 46.52 | Kizilyurtovsky District |
| DM | 77 | 77 | 135 | 137 | 170 | 188 | 217 | 221 | 248 | 248 | 151 | 151 | 208 | 212 | 0   | 0   | 260 | 266 | 140 | 150 | 182 | 188 | 43.12 | 46.52 | Kizilyurtovsky District |
| DM | 79 | 89 | 125 | 137 | 170 | 172 | 221 | 223 | 248 | 248 | 143 | 153 | 208 | 212 | 115 | 123 | 262 | 262 | 144 | 152 | 178 | 182 | 43.12 | 46.52 | Kizilyurtovsky District |
| DM | 91 | 93 | 127 | 133 | 160 | 164 | 217 | 217 | 248 | 258 | 143 | 143 | 206 | 216 | 0   | 0   | 264 | 266 | 140 | 146 | 182 | 188 | 43.12 | 46.52 | Kizilyurtovsky District |
| DM | 79 | 79 | 135 | 139 | 168 | 170 | 217 | 221 | 254 | 256 | 143 | 143 | 206 | 206 | 0   | 0   | 266 | 266 | 150 | 156 | 182 | 188 | 43.12 | 46.52 | Kizilyurtovsky District |
| DM | 77 | 85 | 141 | 143 | 160 | 170 | 217 | 219 | 254 | 254 | 161 | 161 | 206 | 216 | 0   | 0   | 264 | 266 | 140 | 156 | 180 | 188 | 43.12 | 46.52 | Kizilyurtovsky District |
| DM | 79 | 81 | 127 | 133 | 160 | 176 | 219 | 221 | 248 | 248 | 143 | 161 | 206 | 214 | 123 | 123 | 264 | 266 | 140 | 150 | 180 | 188 | 43.12 | 46.52 | Kizilyurtovsky District |
| DM | 83 | 83 | 127 | 135 | 160 | 168 | 217 | 217 | 248 | 248 | 143 | 151 | 206 | 212 | 115 | 117 | 266 | 266 | 140 | 148 | 178 | 180 | 43.12 | 46.52 | Kizilyurtovsky District |
| DM | 83 | 95 | 127 | 135 | 170 | 176 | 219 | 221 | 248 | 248 | 147 | 151 | 212 | 214 | 117 | 0   | 258 | 266 | 144 | 148 | 178 | 182 | 43.12 | 46.52 | Kizilyurtovsky District |
| DM | 83 | 93 | 131 | 135 | 160 | 170 | 217 | 219 | 248 | 252 | 151 | 151 | 208 | 212 | 0   | 0   | 260 | 266 | 140 | 150 | 182 | 182 | 43.12 | 46.52 | Kizilyurtovsky District |
| DM | 81 | 81 | 133 | 139 | 162 | 172 | 217 | 219 | 248 | 248 | 143 | 143 | 204 | 214 | 113 | 115 | 262 | 266 | 140 | 152 | 180 | 182 | 43.12 | 46.52 | Kizilyurtovsky District |
| DM | 81 | 83 | 139 | 143 | 170 | 182 | 217 | 219 | 248 | 254 | 161 | 161 | 206 | 206 | 0   | 0   | 266 | 266 | 140 | 140 | 182 | 188 | 43.12 | 46.52 | Kizilyurtovsky District |
| DM | 83 | 87 | 135 | 143 | 170 | 182 | 219 | 221 | 248 | 254 | 161 | 161 | 200 | 206 | 117 | 123 | 266 | 266 | 140 | 148 | 180 | 182 | 43.12 | 46.52 | Kizilyurtovsky District |
| DM | 83 | 91 | 135 | 137 | 160 | 162 | 213 | 219 | 248 | 260 | 153 | 153 | 200 | 214 | 117 | 117 | 266 | 280 | 144 | 148 | 182 | 188 | 43.12 | 46.52 | Kizilyurtovsky District |
| DM | 83 | 83 | 133 | 135 | 166 | 170 | 221 | 221 | 248 | 256 | 143 | 143 | 206 | 208 | 0   | 0   | 264 | 266 | 144 | 150 | 182 | 188 | 43.12 | 46.52 | Kizilyurtovsky District |
| DM | 79 | 83 | 125 | 127 | 166 | 168 | 217 | 221 | 248 | 248 | 141 | 151 | 212 | 214 | 115 | 121 | 262 | 266 | 144 | 148 | 178 | 182 | 43.12 | 46.52 | Kizilyurtovsky District |
| DM | 81 | 81 | 131 | 133 | 160 | 182 | 217 | 221 | 248 | 248 | 169 | 175 | 214 | 214 | 115 | 123 | 258 | 270 | 140 | 144 | 180 | 180 | 43.12 | 46.52 | Kizilyurtovsky District |
| DM | 79 | 79 | 139 | 143 | 168 | 170 | 217 | 221 | 248 | 248 | 143 | 151 | 206 | 208 | 115 | 117 | 260 | 262 | 148 | 150 | 180 | 190 | 43.12 | 46.52 | Kizilyurtovsky District |
| DM | 83 | 83 | 127 | 129 | 176 | 176 | 217 | 217 | 248 | 248 | 143 | 143 | 206 | 212 | 115 | 115 | 266 | 266 | 140 | 150 | 180 | 182 | 43.12 | 46.52 | Kizilyurtovsky District |
| DM | 83 | 95 | 127 | 131 | 160 | 160 | 219 | 221 | 248 | 260 | 147 | 161 | 206 | 208 | 115 | 117 | 260 | 262 | 144 | 144 | 182 | 188 | 43.12 | 46.52 | Kizilyurtovsky District |
| DM | 83 | 91 | 129 | 137 | 160 | 176 | 217 | 221 | 248 | 260 | 161 | 161 | 206 | 208 | 0   | 0   | 266 | 266 | 140 | 144 | 180 | 188 | 43.12 | 46.52 | Kizilyurtovsky District |
| DM | 79 | 81 | 133 | 137 | 160 | 166 | 217 | 221 | 248 | 256 | 143 | 181 | 206 | 212 | 115 | 117 | 266 | 266 | 140 | 150 | 178 | 182 | 43.12 | 46.52 | Kizilyurtovsky District |
| DM | 87 | 97 | 139 | 139 | 160 | 162 | 217 | 221 | 248 | 248 | 139 | 151 | 204 | 206 | 0   | 0   | 258 | 260 | 150 | 152 | 182 | 188 | 43.12 | 46.52 | Kizilyurtovsky District |
| DM | 81 | 81 | 127 | 139 | 162 | 168 | 217 | 221 | 248 | 248 | 161 | 161 | 206 | 208 | 115 | 117 | 262 | 262 | 148 | 150 | 180 | 180 | 43.12 | 46.52 | Kizilyurtovsky District |

|    |    |    |     |     |     |     |     |     |     |     |     |     |     |     |     |     |     |     |     |     |     |     |       |       |                         |
|----|----|----|-----|-----|-----|-----|-----|-----|-----|-----|-----|-----|-----|-----|-----|-----|-----|-----|-----|-----|-----|-----|-------|-------|-------------------------|
| DM | 0  | 0  | 139 | 139 | 170 | 180 | 219 | 223 | 248 | 248 | 143 | 143 | 196 | 196 | 115 | 117 | 258 | 262 | 144 | 144 | 182 | 188 | 43.12 | 46.52 | Kizilyurtovsky District |
| DM | 81 | 91 | 135 | 141 | 160 | 184 | 217 | 217 | 248 | 248 | 151 | 153 | 206 | 214 | 115 | 123 | 262 | 266 | 150 | 156 | 182 | 188 | 43.12 | 46.52 | Kizilyurtovsky District |
| DM | 87 | 87 | 137 | 139 | 162 | 172 | 215 | 221 | 248 | 248 | 143 | 143 | 212 | 214 | 117 | 117 | 264 | 266 | 150 | 150 | 182 | 182 | 43.12 | 46.52 | Kizilyurtovsky District |
| DM | 77 | 83 | 133 | 137 | 170 | 172 | 217 | 219 | 248 | 260 | 143 | 149 | 206 | 208 | 0   | 0   | 266 | 266 | 144 | 148 | 182 | 188 | 43.12 | 46.52 | Kizilyurtovsky District |
| DM | 91 | 91 | 135 | 135 | 170 | 170 | 219 | 221 | 248 | 248 | 143 | 151 | 206 | 212 | 117 | 117 | 260 | 266 | 148 | 150 | 182 | 188 | 43.12 | 46.52 | Kizilyurtovsky District |
| DM | 83 | 91 | 135 | 137 | 160 | 180 | 217 | 219 | 248 | 254 | 143 | 143 | 206 | 216 | 117 | 117 | 264 | 266 | 148 | 150 | 188 | 188 | 43.12 | 46.52 | Kizilyurtovsky District |
| DM | 81 | 81 | 133 | 139 | 170 | 176 | 217 | 221 | 248 | 254 | 161 | 161 | 202 | 206 | 123 | 123 | 264 | 266 | 140 | 150 | 180 | 188 | 43.12 | 46.52 | Kizilyurtovsky District |
| DM | 97 | 97 | 127 | 135 | 170 | 172 | 219 | 221 | 248 | 248 | 143 | 143 | 206 | 212 | 115 | 117 | 260 | 266 | 144 | 156 | 182 | 182 | 43.12 | 46.52 | Kizilyurtovsky District |
| DM | 81 | 91 | 133 | 135 | 160 | 162 | 217 | 221 | 248 | 248 | 151 | 151 | 206 | 208 | 123 | 123 | 264 | 266 | 140 | 140 | 182 | 182 | 43.12 | 46.52 | Kizilyurtovsky District |
| DM | 77 | 93 | 135 | 135 | 170 | 188 | 217 | 217 | 248 | 260 | 161 | 173 | 206 | 212 | 117 | 123 | 266 | 266 | 140 | 144 | 182 | 182 | 43.12 | 46.52 | Kizilyurtovsky District |
| DM | 87 | 97 | 131 | 135 | 176 | 188 | 219 | 221 | 248 | 248 | 151 | 151 | 214 | 216 | 115 | 117 | 258 | 260 | 144 | 148 | 178 | 182 | 43.12 | 46.52 | Kizilyurtovsky District |
| DM | 93 | 93 | 127 | 137 | 168 | 168 | 217 | 217 | 248 | 260 | 151 | 153 | 206 | 212 | 115 | 115 | 266 | 266 | 140 | 150 | 182 | 182 | 43.12 | 46.52 | Kizilyurtovsky District |
| DM | 87 | 91 | 131 | 135 | 170 | 188 | 221 | 221 | 260 | 260 | 143 | 161 | 208 | 214 | 117 | 117 | 260 | 260 | 140 | 144 | 182 | 182 | 43.12 | 46.52 | Kizilyurtovsky District |
| DM | 79 | 79 | 133 | 135 | 168 | 168 | 217 | 219 | 248 | 260 | 173 | 173 | 200 | 214 | 123 | 123 | 266 | 266 | 140 | 144 | 182 | 182 | 43.12 | 46.52 | Kizilyurtovsky District |
| DM | 79 | 83 | 127 | 137 | 154 | 188 | 217 | 221 | 248 | 260 | 161 | 173 | 200 | 216 | 113 | 117 | 266 | 266 | 144 | 150 | 182 | 188 | 43.12 | 46.52 | Kizilyurtovsky District |
| DM | 93 | 99 | 127 | 135 | 170 | 172 | 217 | 221 | 248 | 254 | 143 | 173 | 206 | 208 | 115 | 123 | 266 | 266 | 144 | 144 | 182 | 182 | 43.12 | 46.52 | Kizilyurtovsky District |
| DM | 91 | 97 | 131 | 139 | 160 | 172 | 217 | 221 | 254 | 260 | 143 | 153 | 208 | 216 | 115 | 115 | 260 | 260 | 150 | 156 | 182 | 188 | 43.12 | 46.52 | Kizilyurtovsky District |
| DM | 77 | 83 | 127 | 133 | 168 | 176 | 217 | 219 | 248 | 248 | 151 | 173 | 206 | 212 | 117 | 117 | 258 | 266 | 140 | 144 | 182 | 182 | 43.12 | 46.52 | Kizilyurtovsky District |
| DM | 79 | 89 | 131 | 137 | 172 | 188 | 219 | 221 | 248 | 248 | 143 | 147 | 200 | 206 | 115 | 117 | 266 | 266 | 140 | 148 | 182 | 182 | 43.12 | 46.52 | Kizilyurtovsky District |
